# Supplementary material for: A first-principles study of multilayer Ti3C2Tx MXene model
Source: Royal Society of Chemistry journal article supplement (doi:10.1039/d4nr02319f), 2024-01-01
Supplement: d4nr02319f1.pdf [file d4nr02319f1.pdf]

# Supplementary Information: A First-Principles Study of Multilayer $\text{Ti}_3\text{C}_2\text{T}_x$ MXene Model

Yi Zhi Chu<sup>1,2</sup>, Kah Chun Lau<sup>2\*</sup>

<sup>1</sup>Department of Physics, Michigan Technological University, Houghton, MI 49931, USA

<sup>2</sup>Department of Physics and Astronomy, California State University, Northridge, CA 91330, USA

\*Correspondence: [kahchun.lau@csun.edu](mailto:kahchun.lau@csun.edu)

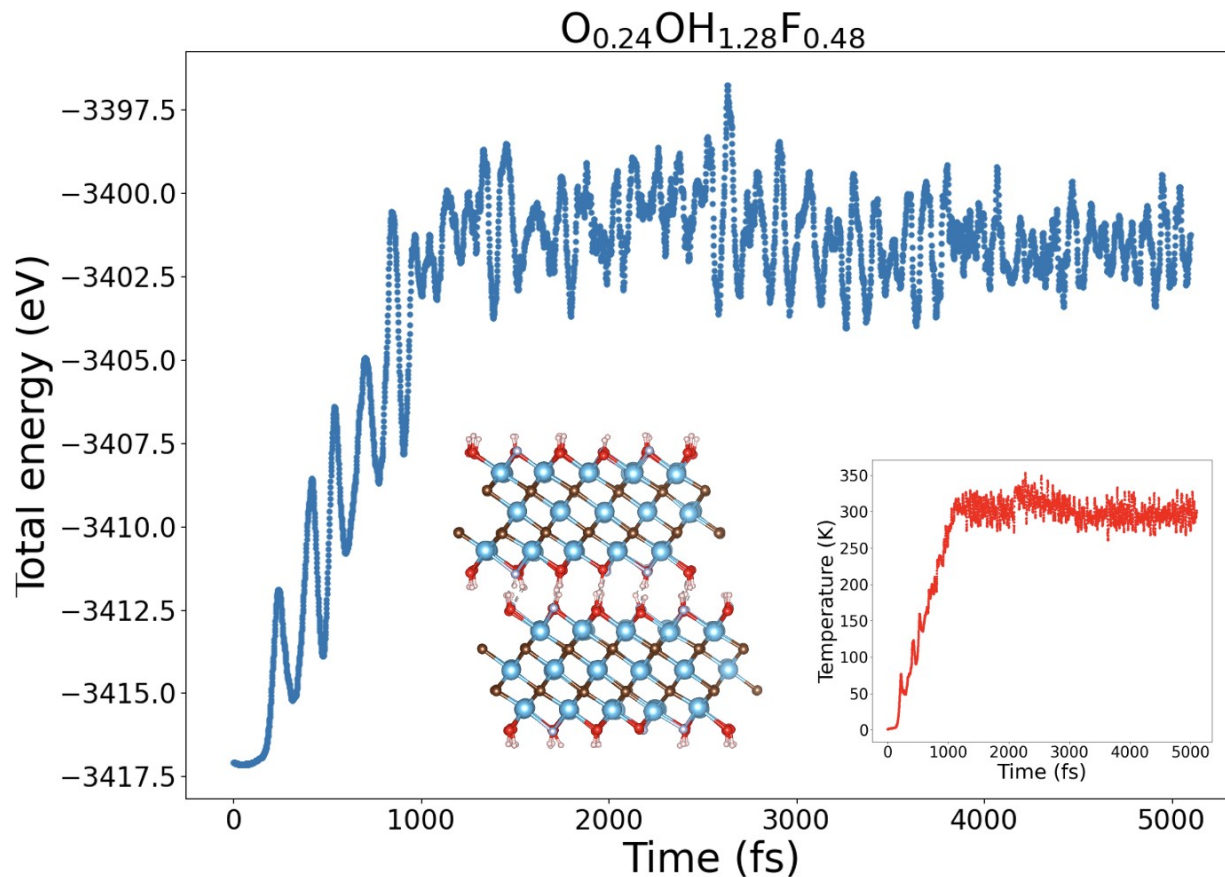

Figure S1. Thermal stability of the optimized  $\text{Ti}_3\text{C}_2\text{T}_x$  ( $\text{T}_x = \text{O}_{0.24}\text{OH}_{1.28}\text{F}_{0.48}$ ) multilayer structure at 300 K for 5 ps AIMD simulation. The inset shows the thermal equilibrated structure upon heating to 300 K.

Table S1. The total energy of multilayer  $\text{Ti}_3\text{C}_2\text{T}_x$  with P-trigonal and P-octahedral stacking after full structural relaxation.

| $\text{T}_x$                                     | Total energy (eV) |              |
|--------------------------------------------------|-------------------|--------------|
|                                                  | P-trigonal        | P-octahedral |
| $\text{F}_2$                                     | -2963.65978       | -2967.23103  |
| $\text{O}_2$                                     | -3225.48482*      | -3225.45555  |
| $\text{OH}_2$                                    | -3562.73442       | -3576.21684  |
| $\text{H}_2$                                     | -2781.17203*      | -2779.38226  |
| $\text{O}_{0.24}\text{OH}_{1.28}\text{F}_{0.48}$ | -3392.74955       | -3403.18012  |
| $\text{O}_{0.24}\text{OH}_{0.64}\text{F}_{1.12}$ | -3192.29390       | -3203.63817  |

\*The final optimized structure is P-octahedral stacking.

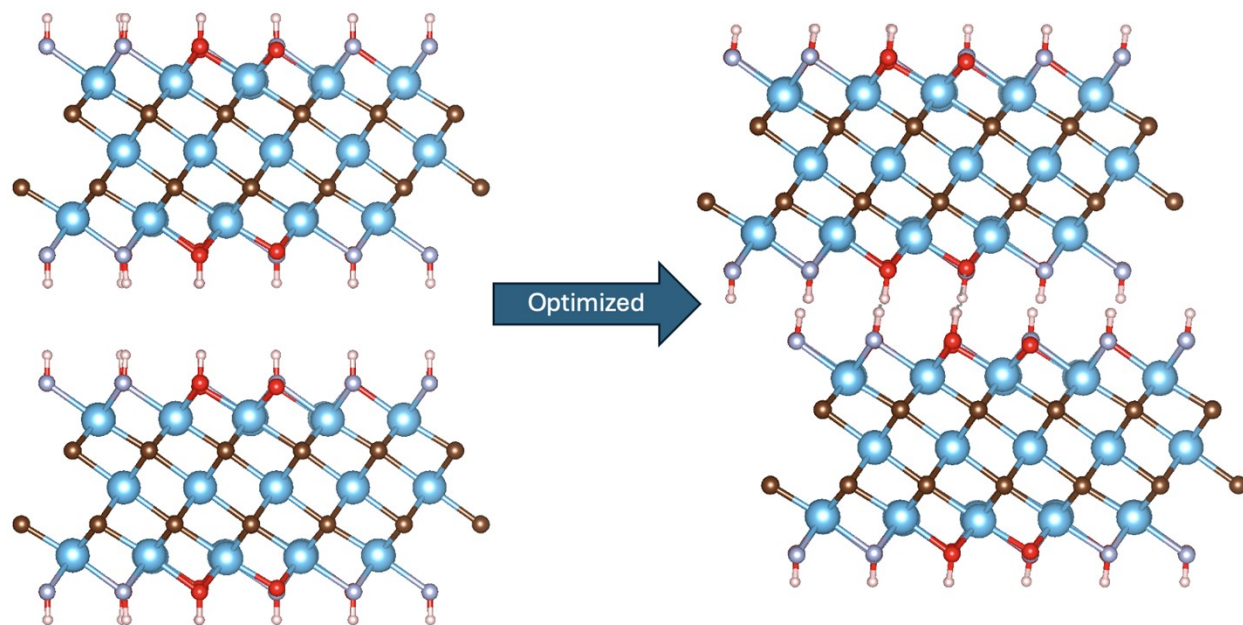

Figure S2. Initial and optimized structures of multilayer  $\text{Ti}_3\text{C}_2\text{T}_x$ . The initial configuration begins with P-trigonal stacking where the adjacent terminal groups face directly towards each other. Upon geometrical optimization, the final optimized structure resembles P-octahedral stacking.

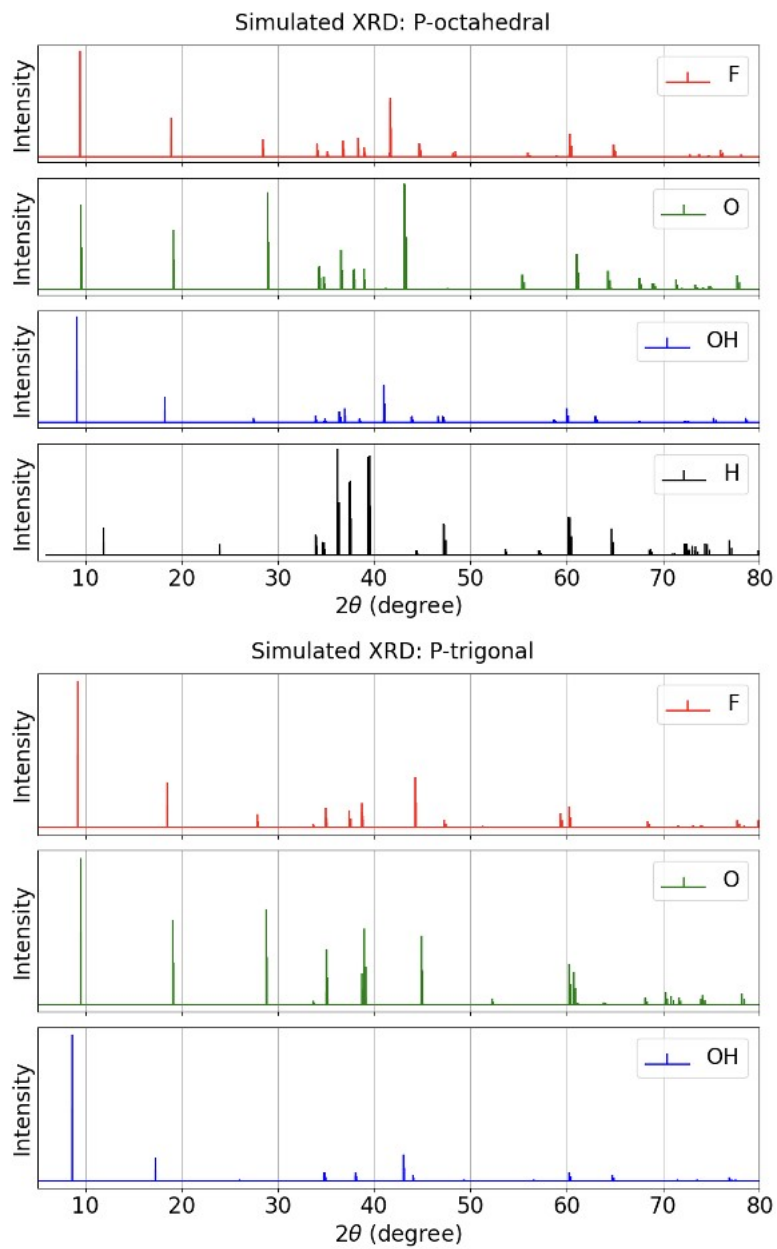

Figure S3. The simulated XRD of uniform F/O/OH/H terminated  $Ti_3C_2T_x$  multilayers with P-octahedral and P-trigonal stacking.

Table S2. Calculated  $d$ -spacing of uniform O/OH/F/H and ternary/quaternary mixed O/OH/F/H-terminated  $\text{Ti}_3\text{C}_2\text{T}_x$  multilayers.

| $T_x$                                                           | $d$ -spacing ( $\text{\AA}$ ) |
|-----------------------------------------------------------------|-------------------------------|
| $\text{O}_2$                                                    | 9.24                          |
| $\text{OH}_2$                                                   | 9.83                          |
| $\text{F}_2$                                                    | 9.38                          |
| $\text{H}_2$                                                    | 7.43                          |
| $\text{O}_{0.24}\text{OH}_{1.20}\text{F}_{0.48}\text{H}_{0.08}$ | 9.60                          |
| $\text{O}_{0.24}\text{OH}_{0.64}\text{F}_{0.48}\text{H}_{0.64}$ | 9.60                          |
| $\text{O}_{0.24}\text{F}_{0.48}\text{H}_{1.28}$                 | 7.97                          |

### Simulated XRD

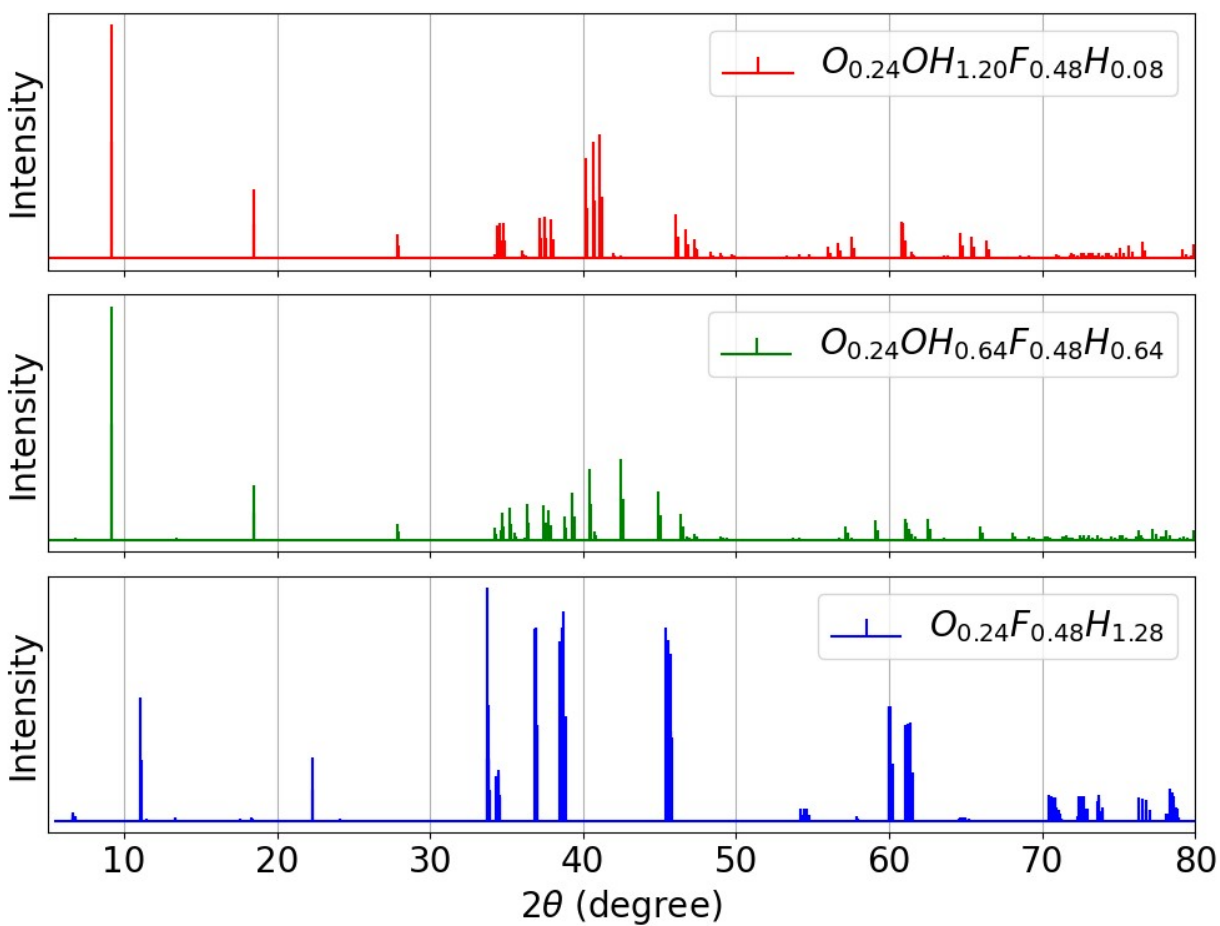

Figure S4. From the top to the bottom, the simulated XRD of quaternary/ternary mixed F/O/OH/H terminated  $Ti_3C_2T_x$  multilayers with different stoichiometry etched with 5 wt. % HF.

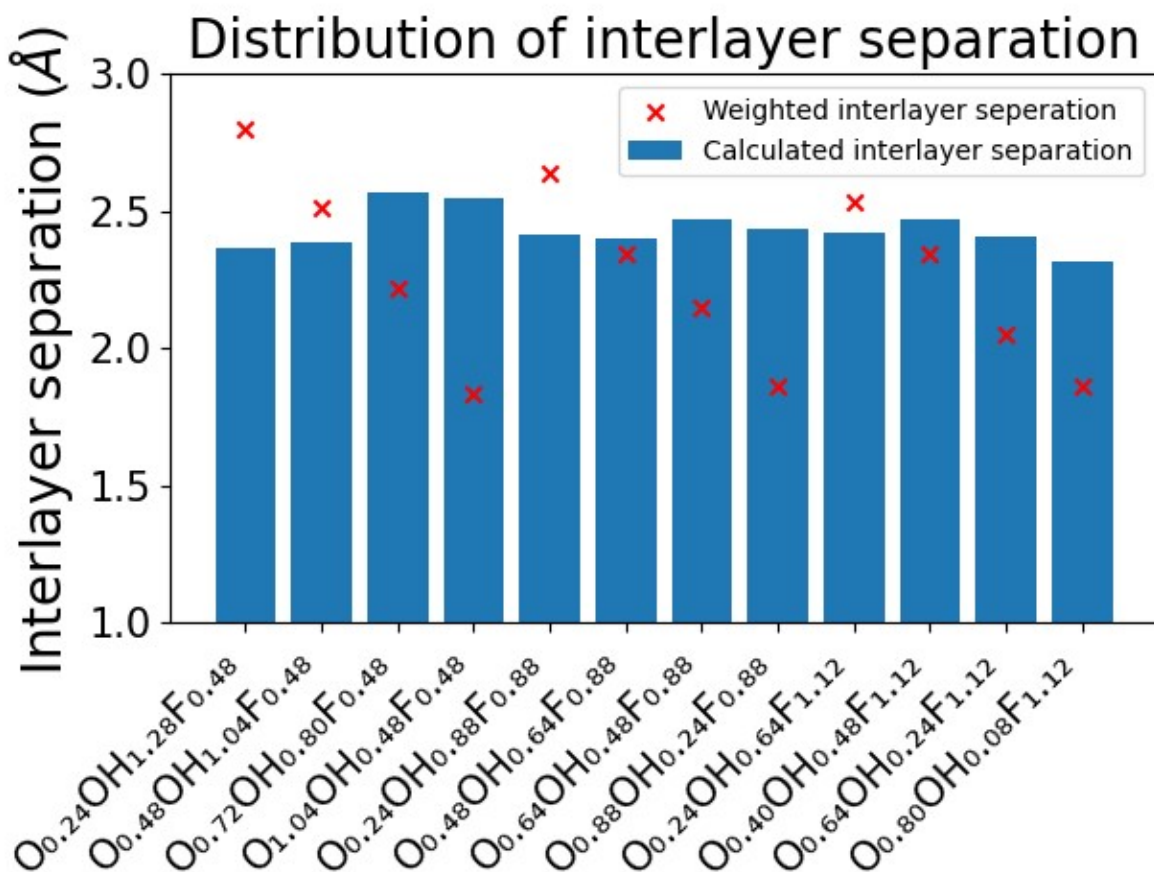

Figure S5. Distribution of interlayer separation with the fitting. The fitting function used the mean of the interlayer separation values of the uniform O-/OH-/F-terminated  $Ti_3C_2T_x$  multilayer with P-trigonal and P-octahedral stacking. From the left to the right, the  $Ti_3C_2T_x$  with different  $T_x$  stoichiometry is found by etching with 5, 10, and 48 wt. % HF.

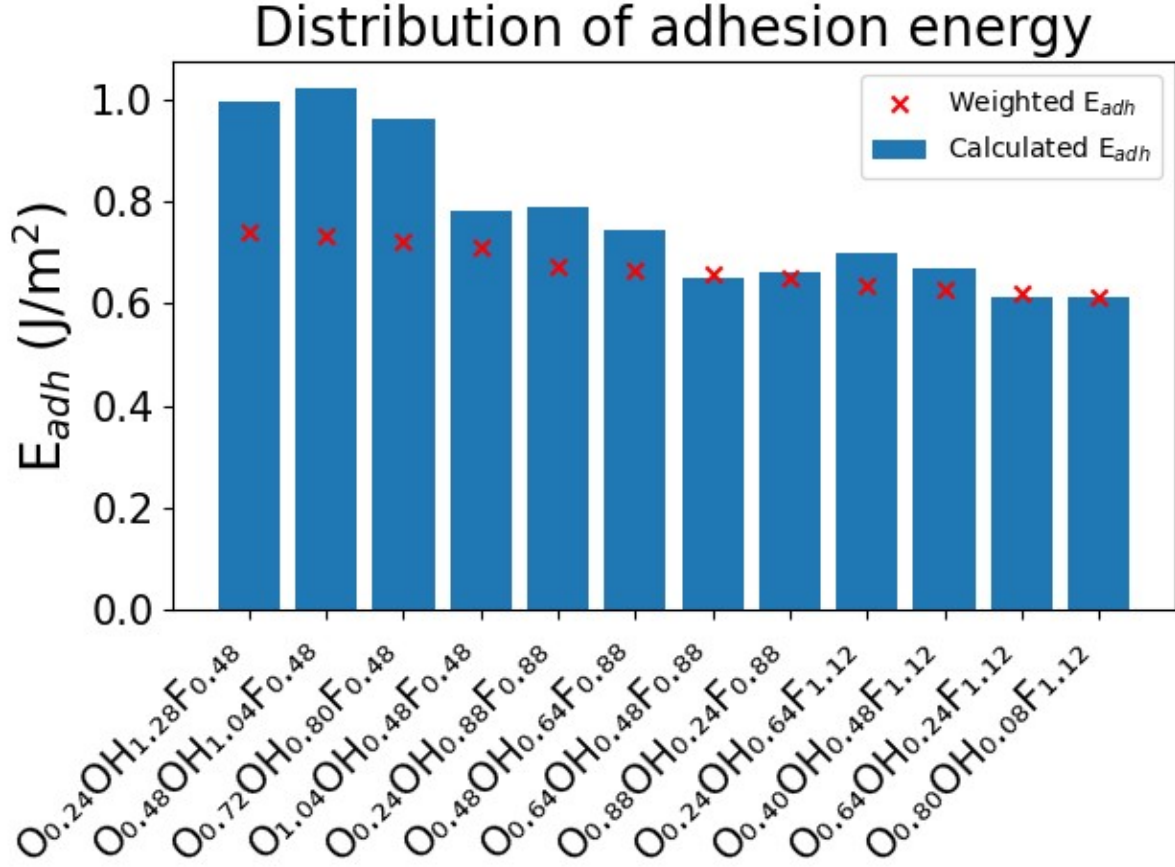

Figure S6. Distribution of adhesion energy with varying  $T_x$  stoichiometry. From the left to the right, the  $Ti_3C_2T_x$  with different  $T_x$  stoichiometry is found by etching with 5, 10, and 48 wt. % HF.

The weighted interlayer separation is given as:

$$d_{weighted} = a \cdot \frac{(d_O^o + d_O^t)}{2} + b \cdot \frac{(d_{OH}^o + d_{OH}^t)}{2} + c \cdot \frac{(d_F^o + d_F^t)}{2} - b \cdot \frac{(d_{OH}^t - d_{OH}^o)}{2}$$

where  $d_x^o$ ,  $d_x^t$  are the optimized interlayer separation of uniform terminated multilayer  $Ti_3C_2T_x$  structures with  $x = O, OH, F$ , with P-octahedral and P-trigonal stacking respectively, and  $a, b, c$  are the O, OH, F percentage respectively.

The weighted adhesion energy is given as:

$$E_{adh}^{weighted} = a \cdot E_{adh}^O + b \cdot E_{adh}^{OH} + c \cdot E_{adh}^F$$

where  $E_{adh}^x$ , is the calculated adhesion energy of the uniform terminated multilayer  $Ti_3C_2T_x$  structures with  $x = O, OH, F, a, b, c$  are the O, OH, F percentage respectively.

Table S3. Calculated adhesion energy of ternary and quaternary mixed H-terminated  $Ti_3C_2T_x$ .

| $T_x$                               | $E_{adh}$ (J/m <sup>2</sup> ) |
|-------------------------------------|-------------------------------|
| $O_{0.24}OH_{1.20}F_{0.48}H_{0.08}$ | 0.95                          |
| $O_{0.24}OH_{0.64}F_{0.48}H_{0.64}$ | 0.79                          |
| $O_{0.24}F_{0.48}H_{1.28}$          | 1.09                          |

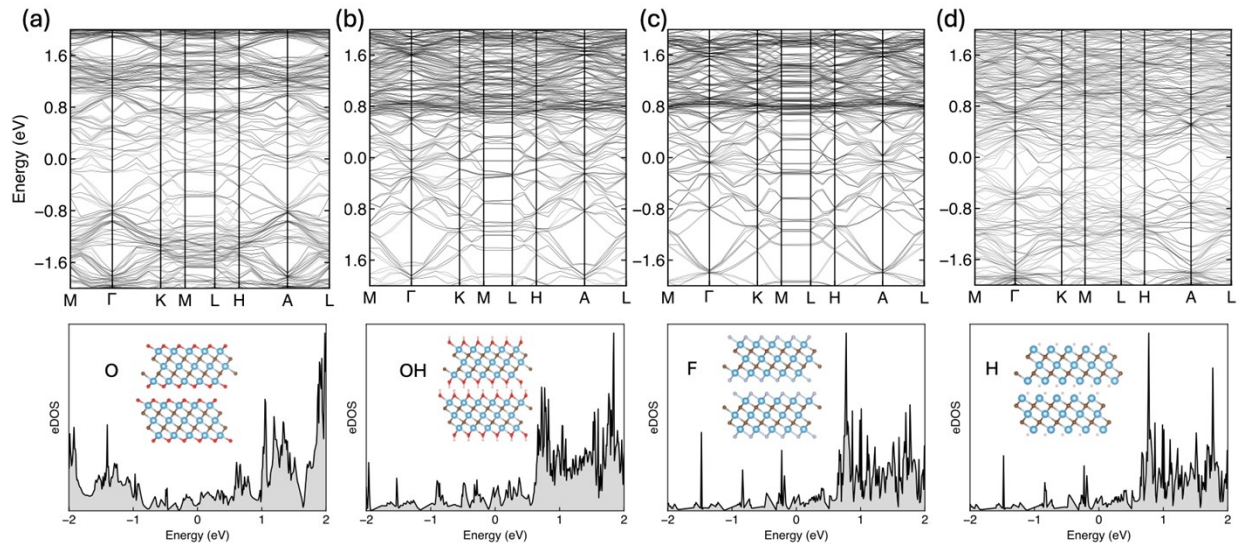

Figure S7. Electronic band structure and density of states of uniform O/OH/F/H-terminated multilayer  $Ti_3C_2T_x$ . All of the structures are found to be metallic.



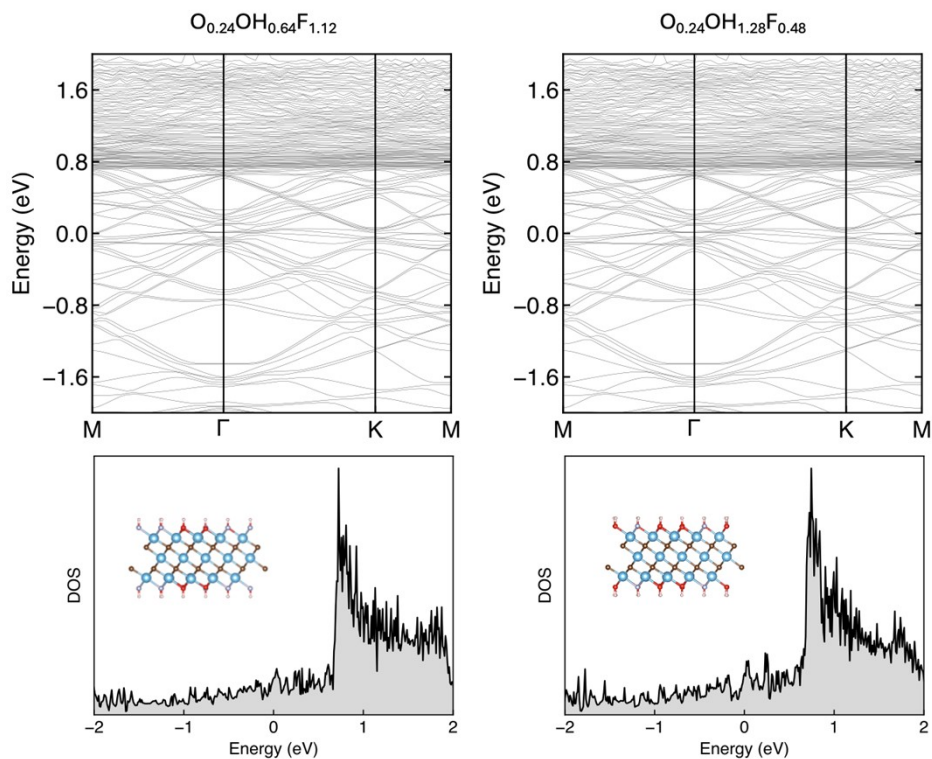

Figure S8. Electronic band structure and density of states of monolayer  $Ti_3C_2T_x$  with  $T_x = O_{0.24}OH_{0.64}F_{1.12}$  and  $O_{0.24}OH_{1.28}F_{0.48}$ , showing metallic characteristic.

Table S4. -ICOHP of the atomic pairs in different structures.

| -ICOHP pairs              | Pair distance (Å) | $T_x$ /Structure                 | -ICOHP (eV) |
|---------------------------|-------------------|----------------------------------|-------------|
| F-F                       | 2.85              | $F_2$                            | 0.003       |
| O-O                       | 2.9               | $O_2$                            | 0.02        |
| O-H                       | 2.26              | $OH_2$                           | 0.15        |
| H-H                       | 2.10              | $H_2$                            | 0.04        |
| Ti-H                      | 1.88-1.93         | $H_2$                            | 1.18-1.36   |
|                           | 1.87              | $TiH_2$ crystal                  | 1.21        |
|                           | 1.9               | $T_x = O_{0.24}F_{0.48}H_{1.28}$ | 1.41        |
| Ti-O                      | 1.95-2.0          | $TiO_2$ crystal                  | 3.18-3.60   |
|                           | 1.97              | $T_x = O_{0.24}F_{0.48}H_{1.28}$ | 3.4         |
| Ti-F                      | 2.0               | $T_x = O_{0.24}F_{0.48}H_{1.28}$ | 2.4         |
|                           | 1.97              | $TiF_3$ crystal                  | 3.0         |
| O( $H_2O$ )-<br>H( $OH$ ) | 1.5-1.8           | $Ti_3C_2T_x \cdot H_2O$          | 0.5-2.5     |
| H( $OH$ )-F               | 1.6               | $Ti_3C_2T_x \cdot H_2O$          | 1.0-1.5     |
